# Supplementary material for: Anillin propels myosin-independent constriction of actin rings
Source: PubMed Central journal article supplement (PMC8319318; doi:10.1038/s41467-021-24474-1), 2021-07-28
Supplement: 41467_2021_24474_MOESM2_ESM.pdf [file 41467_2021_24474_MOESM2_ESM.pdf]

## REVIEWER COMMENTS

### Reviewer #1 (Remarks to the Author):

The authors have satisfactorily addressed my questions and I support the publication of this manuscript.

### Reviewer #2 (Remarks to the Author):

This study by Kucera et al. describes the novel role of anillin in sliding actin filaments in vitro. The revised manuscript has sufficiently addressed most of the reviewer's concerns. However, the reviewer still has double in regard to the most important concern raised in the 1st round of review. The purity of the recombinant anillin and whether it contains non-myosin II remain unclear. This is despite that the authors added three lines of evidence to demonstrate that the protein prep is free of non-myosin II. As the reviewer enumerated below, all of these new results either remain unconvincing or raise fresh questions.

(1) The added SDS-PAGE gel of anillin (Fig. S1a) is not convincing. Instead, it raised more questions in regard to the purify of the prep. There are at least two major bands in the lane loaded with anillin. The major band appeared to be a protein of >200 kilodaltons (KDs). This is far larger than the predicted molecular weight (MW) of anillin-GFP at 147 KDs. The human anillin shall be of 1,087 amino acids, giving it a MW of ~120 KDs. The minor band in the lane is close to 100 KD which makes it unlikely to be anillin-GFP either. In contrary, the MW of non-muscle myosin II is actually ~ 230 KDs, closer to the major band in the lane.

(2) The added mass-spec analysis (Table S1) is confusing and not informative. The table is hard to understand without explanation. It appears that only anillin peptides was tested.

(3) The newly added experiment of blebbistatin is not conclusive (S1I and F). The concentration of this small molecule inhibitor of myosin II used by the authors was just too low. The IC50 for non-muscle myosin II is > 5 $\mu$ M, as reported by the group of James Seller and Tim Mitchison (Limouze 2004, Journal of Muscle Research and Cell Motility). The used concentration of 0.5 $\mu$ M was one order of magnitude lower than the IC50.

Lastly, the authors argued that the sliding of overlapped actin filaments proved that myosin II is not involved. The reviewer will disagree with this conclusion as the polarity of actin filaments in most experiments in this was not determined.

Another major concern that remains unresolved is the affinity between anillin and actin filaments (Fig. S1C). The measurement of this Kd has major ramifications in interpreting most experiments in which the authors used only nanomolar concentration of anillin. A similar point was raised by the reviewer 3. The presented measurement based solely on TIRF is not convincing. The best fit is still relatively poor with a R2 of only 0.25. It does not give much confidence to this data. If the amount of anillin is too slow for any classical sedimentation assay, the reviewer would suggest isothermal titration calorimetry (ITC) which uses far smaller amount of protein.

The reviewer will not recommend the acceptance of this manuscript at this point but will be happy to review it again after the two major concerns have been addressed.

### Reviewer #3 (Remarks to the Author):

The authors have satisfactorily addressed my questions and concerns. I recommend publication.

We thank the reviewers for their comments. We addressed all the raised comments, and we altered the manuscript accordingly (new text is highlighted in the manuscript). Below, please find a point-by-point answer to the comments.

Reviewer #1 (Remarks to the Author):

The authors have satisfactorily addressed my questions and I support the publication of this manuscript.

We thank the Reviewer for the positive words.

Reviewer #2 (Remarks to the Author):

This study by Kucera et al. describes the novel role of anillin in sliding actin filaments in vitro. The revised manuscript has sufficiently addressed most of the reviewer's concerns. However, the reviewer still has double in regard to the most important concern raised in the 1st round of review. The purity of the recombinant anillin and whether it contains non-myosin II remain unclear. This is despite that the authors added three lines of evidence to demonstrate that the protein prep is free of non-myosin II. As the reviewer enumerated below, all of these new results either remain unconvincing or raise fresh questions. (1) The added SDS-PAGE gel of anillin (Fig. S1a) is not convincing. Instead, it raised more questions in regard to the purity of the prep. There are at least two major bands in the lane loaded with anillin. The major band appeared to be a protein of >200 kilodaltons (KDs). This is far larger than the predicted molecular weight (MW) of anillin-GFP at 147 KDs. The human anillin shall be of 1,087 amino acids, giving it a MW of ~120 KDs. The minor band in the lane is close to 100 KD which makes it unlikely to be anillin-GFP either. In contrary, the MW of non-muscle myosin II is actually ~ 230 KDs, closer to the major band in the lane.

We have performed a proteomic mass spectrometry analysis of the anillin preparation. This analysis revealed that the most abundant protein is anillin, comprising roughly 60% of the preparation. The second most abundant protein in the preparation is a heat shock protein 70, comprising roughly 4% of the preparation. All the remaining proteins are remnants comprising negligible quantities of the preparation, including myosin-II comprising about 0.2% of the preparation. Previously, we have only shown two entries from the mass spectrometry results table, comparing the amount of anillin and myosin-II in the preparation (Table S1). **Now we have added the full table as a sheet in the Excel notebook summarizing all the raw data and accompanying the manuscript.**

**Additionally, we have now cut out the main band from the SDS gel and performed a MALDI-FTICR Peptide Mass Fingerprinting analysis of this band only. The result confirmed that the main band on the gel is anillin (please, see the report below for details on the sequence coverage).** We speculate that the reason why anillin is migrating at an apparent larger mass size might be due to posttranslational modifications as discussed, e.g. in Yunhua et al. "Abnormal SDS-PAGE Migration of Cytosolic Proteins Can Identify Domains and Mechanisms That Control Surfactant Binding." *Protein Science*, 2012, 21 (8): 1197–1209.

(2) The added mass-spec analysis (Table S1) is confusing and not informative. The table is hard to understand without explanation. It appears that only anillin peptides was tested.

We apologize for not being clearer about the mass spectrometry results. As mentioned above, we showed only two lines from the whole mass spectrometry table with the intention to compare the relative amount of anillin and myosin-II. **We now show the whole table as a supplementary file - an Excel notebook accompanying the manuscript and summarizing all raw data gathered during the study. We also rephrased the Methods section referring to the proteomic mass spectrometry analysis to make the table clearer.**

(3) The newly added experiment of blebbistatin is not conclusive (S1I and F). The concentration of this small molecule inhibitor of myosin II used by the authors was just too low. The IC<sub>50</sub> for non-muscle myosin II is > 5µM, as reported by the group of James Seller and Tim Mitchison (Limouze 2004, *Journal of Muscle Research and Cell Motility*). The used concentration of 0.5µM was one order of magnitude lower than the IC<sub>50</sub>.

We agree with the reviewer that using the inhibitor blebbistatin might not have been the best choice as different myosin motor proteins are inhibited by a given concentration of blebbistatin to a different extent. **We have now performed a new experiment to address this issue.** In the experimental setup of Fig. 1, we have exchanged the buffer including ATP for a buffer that does not contain ATP. To this buffer, we have added hexokinase to remove any remnants of ATP in the buffer and AMP-PNP (β,γ-Imidoadenosine 5'-triphosphate lithium salt hydrate), which is a non-hydrolysable analogue of ATP and which prevents the functioning of molecular motors, which are dependent on ATP-hydrolysis. At these conditions, we have repeated the experiment presented in Fig.

1g. At these conditions, in the absence of ATP and the presence of AMP-PNP, we observe robust sliding of partially overlapping filaments in the presence of anillin. The sliding is qualitatively comparable to the sliding observed in other analogous experiments presented in Fig. 1 and S1. As AMP-PNP blocks the activity of molecular motors, we conclude that the sliding is driven by the actin crosslinking protein anillin. **We present this new data in the Fig. S1i, and discuss it in the main text when describing the data of Figure 1.**

Lastly, the authors argued that the sliding of overlapped actin filaments proved that myosin II is not involved. The reviewer will disagree with this conclusion as the polarity of actin filaments in most experiments in this was not determined.

We apologize for not being clearer in this respect. We believe that the important distinction is between filament pairs that overlap fully and filament pairs that overlap partially. In our experiments, both types of filament pairs form. We thus observe some filament pairs that overlap fully and some filament pairs that overlap partially. However, we observe that only those filament pairs that overlap partially do slide and only in the direction increasing the overlap length. In other words, we never observe any directional sliding of filaments overlapping fully. Moreover, the sliding of partially overlapping filaments slows down as the overlap length increases and ceases completely once the filaments overlap fully.

If the sliding was driven by molecular motors, we would observe sliding of both types of filament pairs, fully overlapping and partially overlapping. Moreover, some of the filaments would slide in the direction decreasing the overlap length. Finally, sliding of partially overlapping filaments would not slow down as the overlap length increases. On the other hand, crosslinker generated force of an entropic origin, crucially, i) always acts in the direction increasing the overlap length, ii) decreases with the length of the overlap and iii) is zero when the filaments overlap fully. Thus, while our observations do not support the hypothesis that the sliding is driven by molecular motors, they can be fully explained by the generation of an entropic force in the system, strongly supporting the hypothesis that the sliding is driven by such a force generated by anillin. **We now reformulated the text (starting with the line 88) to make this clearer.**

Another major concern that remains unresolved is the affinity between anillin and actin filaments (Fig. S1C). The measurement of this  $K_d$  has major ramifications in interpreting most experiments in which the authors used only nanomolar concentration of anillin. A similar point was raised by the reviewer 3. The presented measurement based solely on TIRF is not convincing. The best fit is still relatively poor with a  $R^2$  of only 0.25. It does not give much confidence to this data. If the amount of anillin is too slow for any classical sedimentation assay, the reviewer would suggest isothermal titration calorimetry (ITC) which uses far smaller amount of protein. The reviewer will not recommend the acceptance of this manuscript at this point but will be happy to review it again after the two major concerns have been addressed.

To determine the affinity of anillin for actin filaments more reliably, **we have performed a new experiment titrating increasing concentrations of anillin to the actin filaments and measuring the amount of anillin protein bound at a steady-state situation to the actin filaments.** We have visualized the anillin binding to the filaments by the TIRF microscopy method. The new results show that the  $K_d$  is 7.8 nM, the  $R^2$  of the new fit is 0.98. **We present these new results in the Fig. S1c.** We believe that the TIRF microscopy method, which enables full visual control of the studied system, is the preferred method for studying the interactions of crosslinking proteins with filaments, as it allows to evaluate the affinity of the crosslinkers for a single species of the filament assemblies - in our case single filaments. In bulk assays (such as ITC), filaments and crosslinkers will inevitably form bundles of different sizes and other large-scale network structures, which are not well defined. The affinity value will likely differ between bundles containing various numbers of filaments. Bulk methods will thus likely yield an affinity value, which is a convolute of affinities for the various filament assemblies.

Reviewer #3 (Remarks to the Author):

The authors have satisfactorily addressed my questions and concerns. I recommend publication.

We thank the Reviewer for the positive words.

**mMass Report: 210409\_anillin**

|             |                          |                 |          |
|-------------|--------------------------|-----------------|----------|
| Date        | Fri Apr 09 14:56:04 2021 | Scan Number     | 1        |
| Operator    |                          | Retention Time  | 36.34302 |
| Contact     |                          | MS Level        | 1        |
| Institution |                          | Precursor m/z   |          |
| Instrument  |                          | Polarity        | positive |
|             |                          | Spectrum Points | 4017230  |
|             |                          | Peak List       | 406      |

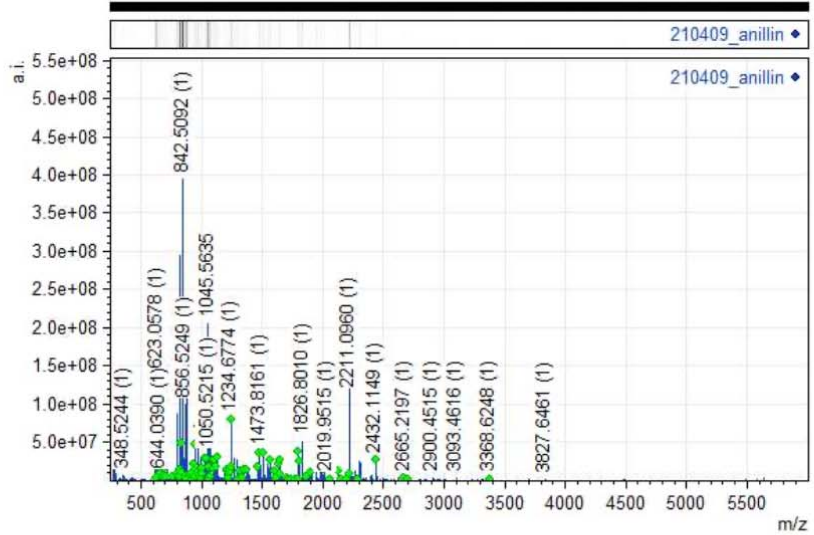

Sequence ->sp|Q9NQW6|ANLN\_HUMAN Anillin OS=Homo sapiens OX=9606 GN=ANLN PE=1 SV=2

| Accession   | Length     | Mo. Mass    | Av. Mass    | Coverage   | Matched Int. |            |            |
|-------------|------------|-------------|-------------|------------|--------------|------------|------------|
|             | 1124       | 125778.2939 | 125855.0092 | 64.3 %     | 26.3 %       |            |            |
| MDPFTEKLE   | RTRARENLO  | RKMAERPTAA  | PRSMTHAKRA  | RQPLSEASNO | QPLSGEEKS    | CTKPSPSKKR | CSDNTEVEVS |
| NLENKQPVES  | TSAKSCSPSP | VSPQVOPQAA  | DTISDSVAVP  | ASLLGMRRGL | NSRLEATAAS   | SVKTRMOKLA | EQRRRDNDND |
| MTDDIPESL   | FSPMPSEEA  | ASPPRPLLSN  | ASATPVGRRG  | RLANLAATIC | SWEDDVNSHF   | AKQNSVQEQP | GTACLKSFSS |
| ASGASARINS  | SSVKQEAFC  | SORDGDASLN  | KALSSSADDA  | SLVNASISSS | VKATSPVKST   | TSITDAKSC  | GONPELLPKT |
| PISPLKIGVS  | KPIVKSTLSQ | TVPSKGLSR   | EICLQSQSKD  | KSTTPGGTGI | KPFLERFGER   | COEHSKESPA | RSTPHRTPII |
| TPNTKAIQER  | LFKODTSSST | THLAQQLKQE  | ROKELACLRG  | RFDKGNISWA | EKGGNSKSKQ   | LETKQETHCO | STPLKKHQGV |
| SKTQSLPVTE  | KVTENQIPAK | NSSSTEPKGF  | ECEMTKSSPL  | KITLFLEEDK | SLKVTSDPKV   | EQKIEVIREI | EMSVDDDDIN |
| SSKVINDFLES | DVLEEGELDM | EKSQEEQMDQA | LAESSEEQED  | ALNISSMSLL | APLAQTGVV    | SPELSVSTPR | LELKDTSRSD |
| ESPKPGKFOR  | TRVPRAESGD | SLGSEDRDLL  | YSIDAYRSQR  | EKETERPSIK | QVIVRKEDVT   | SKLDEKNAF  | PCOVNIKQKM |
| QELNNEINMQ  | QTVIYQASQA | LNCVDEEHG   | KGSLEEAFAE  | RLLLIATGKR | TLLIDELNKL   | KNEGPOKKNK | ASPOSEFMPS |
| KGSVTLSEIR  | LPLKADFVCS | TVQKPDAAAY  | YYLILKAGA   | ENMVATPLAS | TSNSLNGDAL   | TFTTFTLQD  | VSNDFEINIE |
| VYSLVQKDP   | SGLDKKKKTS | KSKAITPKRL  | LTSITTKSNI  | HSSVMASPGG | LSAVRTSNFA   | LVGSYTLSSL | SVGNFKFVLD |
| KVPFLSSLG   | HIYLKIKCOV | NSSVEERGFL  | TIFEDVSGFG  | AWHRRWCVLS | GNCSISWTYP   | DDEKRKNPIG | RINLANCTSR |
| QIEPANREFC  | ARRNTFELIT | VRPQREDDRE  | TLVSOCDRTL  | CVTKNWLSD  | TKFEERLWMO   | KLNOVLVDIR | LWQPDACYPK |
|             |            |             |             |            |              |            | IGKP       |

| Position | Modification | Type     | Mo. Mass | Av. Mass | Formula |
|----------|--------------|----------|----------|----------|---------|
| All M    | Oxidation    | variable | 15.9949  | 15.9994  | O       |

| Position | Modification    | Type  | Mo. Mass | Av. Mass | Formula                               |
|----------|-----------------|-------|----------|----------|---------------------------------------|
| All C    | Carbamidomethyl | fixed | 57.0215  | 57.0514  | CH <sub>2</sub> CONH <sub>2</sub> - H |

| Meas. m/z | Calc. m/z | $\delta$ (Da) | $\delta$ (ppm) | Rel. Int. (%) | z | Annotation                                   | Formula       |
|-----------|-----------|---------------|----------------|---------------|---|----------------------------------------------|---------------|
| 622.3311  | 622.3307  | 0.0004        | 0.6            | 1.11          | 1 | [440-444] r.GRFDK.g                          | C27H43N9O8    |
| 628.3893  | 628.3889  | 0.0004        | 0.6            | 4.43          | 1 | [651-655] r.TRVPR.a                          | C26H49N11O7   |
| 655.3523  | 655.3522  | 0.0001        | 0.2            | 2.25          | 1 | [477-482] k.HQGVSK.t                         | C27H46N10O9   |
| 659.3472  | 659.3471  | 0.0001        | 0.1            | 4.43          | 1 | [17-21] r.ENLQR.k                            | C26H46N10O10  |
| 674.3292  | 674.3290  | 0.0001        | 0.2            | 1.19          | 1 | [33-38] r.SMTHAK.r                           | C27H47N9O9S   |
| 682.2978  | 682.2977  | 0.0000        | 0.1            | 5.02          | 1 | [1048-1052] r.EFCAR.r [1xCarbamidomethyl]    | C28H43N9O9S   |
| 684.4155  | 684.4151  | 0.0004        | 0.5            | 4.08          | 1 | [1026-1031] r.KNPIGR.i                       | C29H53N11O8   |
| 690.3239  | 690.3239  | -0.0000       | -0.0           | 1.90          | 1 | [33-38] r.SMTHAK.r [1xOxidation]             | C27H47N9O10S  |
| 700.3375  | 700.3373  | 0.0002        | 0.3            | 1.38          | 1 | [782-787] k.NEGPQR.k                         | C27H45N11O11  |
| 761.3977  | 761.3974  | 0.0002        | 0.3            | 1.49          | 1 | [434-439] k.ELACLR.g [1xCarbamidomethyl]     | C31H56N10O10S |
| 788.3356  | 788.3356  | 0.0000        | 0.0            | 2.23          | 1 | [381-386] r.CQEHSK.e [1xCarbamidomethyl]     | C30H49N11O12S |
| 806.4256  | 806.4254  | 0.0001        | 0.2            | 1.19          | 1 | [696-702] r.KEDVTSK.l                        | C33H59N9O14   |
| 815.4485  | 815.4482  | 0.0003        | 0.3            | 3.87          | 1 | [16-21] r.RENLQR.k                           | C32H58N14O11  |
| 820.4027  | 820.4022  | 0.0005        | 0.6            | 1.20          | 1 | [1096-1101] r.DLWMQK.l                       | C37H57N9O10S  |
| 827.4370  | 827.4370  | -0.0000       | -0.0           | 12.39         | 1 | [1041-1047] r.QJEPANR.e                      | C34H58N12O12  |
| 828.5552  | 828.5553  | -0.0001       | -0.2           | 2.86          | 1 | [762-769] r.LLLIATGK.r                       | C39H73N9O10   |
| 859.4520  | 859.4520  | 0.0001        | 0.1            | 1.23          | 1 | [888-895] k.KDPSGLDK.k                       | C36H62N10O14  |
| 859.4520  | 859.4520  | 0.0001        | 0.1            | 1.23          | 1 | [889-896] k.DPSGLDK.k                        | C36H62N10O14  |
| 876.5400  | 876.5401  | -0.0000       | -0.0           | 0.64          | 1 | [910-917] r.LLTSITK.s                        | C39H73N9O13   |
| 904.4527  | 904.4523  | 0.0004        | 0.4            | 2.24          | 1 | [445-452] k.GNIWSAEK.g                       | C40H61N11O13  |
| 923.4682  | 923.4680  | 0.0001        | 0.2            | 0.46          | 1 | [299-307] k.STTSITDAK.s                      | C37H66N10O17  |
| 928.5821  | 928.5826  | -0.0005       | -0.5           | 5.44          | 1 | [327-335] k.TGVSKPIV.k.s                     | C42H77N11O12  |
| 934.4628  | 934.4629  | -0.0000       | -0.0           | 0.92          | 1 | [1085-1092] k.NWLSADTK.e                     | C41H63N11O14  |
| 940.4485  | 940.4483  | 0.0002        | 0.3            | 11.96         | 1 | [238-247] k.FSSASGASAR.i                     | C38H61N13O15  |
| 944.4681  | 944.4684  | -0.0003       | -0.3           | 3.86          | 1 | [639-647] r.SDESPKPGK.f                      | C39H65N11O16  |
| 946.4844  | 946.4840  | 0.0004        | 0.4            | 1.42          | 1 | [86-94] k.QPVESTSAK.s                        | C39H67N11O16  |
| 959.5159  | 959.5156  | 0.0003        | 0.3            | 2.65          | 1 | [683-690] k.ETERPSIK.q                       | C40H70N12O15  |
| 961.5311  | 961.5313  | -0.0002       | -0.2           | 17.79         | 1 | [802-810] k.GSVTLSEIR.l                      | C40H72N12O15  |
| 961.5311  | 961.5313  | -0.0002       | -0.2           | 17.79         | 1 | [631-638] r.LELKDTSR.s                       | C40H72N12O15  |
| 976.5306  | 976.5310  | -0.0004       | -0.4           | 1.99          | 1 | [134-143] r.LEATAASSVK.t                     | C41H73N11O16  |
| 984.5726  | 984.5724  | 0.0002        | 0.2            | 4.33          | 1 | [397-405] r.TPIITPNTK.a                      | C44H77N11O14  |
| 987.5464  | 987.5469  | -0.0006       | -0.6           | 1.13          | 1 | [888-896] k.KDPSGLDK.k                       | C42H74N12O15  |
| 987.5464  | 987.5469  | -0.0006       | -0.6           | 1.13          | 1 | [889-897] k.DPSGLDK.k                        | C42H74N12O15  |
| 999.5463  | 999.5469  | -0.0006       | -0.6           | 4.25          | 1 | [492-500] k.VTENQIPAK.n                      | C43H74N12O15  |
| 1002.5461 | 1002.5466 | -0.0005       | -0.5           | 2.50          | 1 | [483-491] k.TQSLPVTEK.v                      | C43H75N11O16  |
| 1017.5509 | 1017.5510 | -0.0001       | -0.1           | 7.39          | 1 | [432-439] r.QKELACLR.g [1xCarbamidomethyl]   | C42H76N14O13S |
| 1032.6414 | 1032.6412 | 0.0002        | 0.2            | 7.51          | 1 | [909-917] k.RLLTSITTK.s                      | C45H85N13O14  |
| 1058.6090 | 1058.6092 | -0.0002       | -0.2           | 4.51          | 1 | [771-779] r.TLLIDELNK.l                      | C47H83N11O16  |
| 1060.6354 | 1060.6361 | -0.0007       | -0.7           | 0.56          | 1 | [899-908] k.TSKSKAITPK.r                     | C46H85N13O15  |
| 1069.6112 | 1069.6113 | -0.0000       | -0.0           | 1.29          | 1 | [780-788] k.LKNEGPQRK.n                      | C45H80N16O14  |
| 1069.6363 | 1069.6364 | -0.0001       | -0.1           | 15.25         | 1 | [1102-1110] k.LNQVLVDIR.l                    | C47H84N14O14  |
| 1090.5010 | 1090.5011 | -0.0001       | -0.1           | 6.87          | 1 | [752-761] k.GSLEEAER.I                       | C43H71N13O20  |
| 1092.5347 | 1092.5354 | -0.0007       | -0.6           | 3.91          | 1 | [351-359] r.EICLQSQSK.d [1xCarbamidomethyl]  | C44H77N13O17S |
| 1099.5669 | 1099.5677 | -0.0008       | -0.7           | 6.96          | 1 | [23-32] k.MAERPTAAPR.s                       | C45H78N16O14S |
| 1115.5626 | 1115.5626 | 0.0000        | 0.0            | 4.62          | 1 | [23-32] k.MAERPTAAPR.s [1xOxidation]         | C45H78N16O15S |
| 1126.4941 | 1126.4946 | -0.0005       | -0.5           | 7.84          | 1 | [255-263] k.QEATFCSQR.d [1xCarbamidomethyl]  | C45H71N15O17S |
| 1207.5358 | 1207.5372 | -0.0014       | -1.1           | 3.16          | 1 | [978-987] k.CQVNSSVEER.g [1xCarbamidomethyl] | C46H78N16O20S |
| 1208.5606 | 1208.5616 | -0.0010       | -0.8           | 3.54          | 1 | [791-801] k.ASPQSEFMPSK.g                    | C52H81N13O18S |
| 1214.7097 | 1214.7103 | -0.0006       | -0.5           | 0.91          | 1 | [770-779] k.RTLLIDELNK.l                     | C53H95N15O17  |
| 1222.5180 | 1222.5182 | -0.0002       | -0.2           | 0.98          | 1 | [656-667] r.AESGDSLGSSEDR.d                  | C46H75N15O24  |

| Meas. m/z | Calc. m/z | $\delta$ (Da) | $\delta$ (ppm) | Rel. Int. (%) | z | Annotation                                                                     | Formula          |
|-----------|-----------|---------------|----------------|---------------|---|--------------------------------------------------------------------------------|------------------|
| 1224.5552 | 1224.5565 | -0.0013       | -1.0           | 3.51          | 1 | [791-801] k.ASPQSEFMPSK.g [1xOxidation]                                        | C52H81N13O19S    |
| 1227.6621 | 1227.6627 | -0.0006       | -0.5           | 4.26          | 1 | [22-32] r.KMAERPTAAPR.s                                                        | C51H90N18O15S    |
| 1228.6198 | 1228.6208 | -0.0010       | -0.8           | 2.70          | 1 | [668-677] r.DLLYSIDAYR.s                                                       | C56H85N13O18     |
| 1234.6774 | 1234.6790 | -0.0016       | -1.3           | 20.39         | 1 | [681-690] r.FKETERPSIK.q                                                       | C55H91N15O17     |
| 1243.6567 | 1243.6576 | -0.0008       | -0.7           | 4.40          | 1 | [22-32] r.KMAERPTAAPR.s [1xOxidation]                                          | C51H90N18O16S    |
| 1291.6719 | 1291.6740 | -0.0021       | -1.6           | 0.57          | 1 | [696-706] r.KEDVTSKLDEK.n                                                      | C54H94N14O22     |
| 1304.6401 | 1304.6416 | -0.0014       | -1.1           | 3.39          | 1 | [707-717] k.NNAFPCQVNIK.q [1xCarbamidomethyl]                                  | C56H89N17O17S    |
| 1328.6252 | 1328.6263 | -0.0011       | -0.8           | 1.12          | 1 | [465-475] k.QETHCQSTPLK.k [1xCarbamidomethyl]                                  | C54H89N17O20S    |
| 1347.6573 | 1347.6652 | -0.0078       | -5.8           | 3.90          | 1 | [445-457] k.GNIWSAEKGNSK.s                                                     | C57H90N18O20     |
| 1371.6561 | 1371.6573 | -0.0012       | -0.9           | 3.46          | 1 | [308-319] k.SCEGQNPPELLPK.t [1xCarbamidomethyl]                                | C57H94N16O21S    |
| 1456.7206 | 1456.7213 | -0.0007       | -0.5           | 4.76          | 1 | [465-476] k.QETHCQSTPLKH.h [1xCarbamidomethyl]                                 | C60H101N19O21S   |
| 1473.8161 | 1473.8172 | -0.0011       | -0.7           | 9.29          | 1 | [1054-1065] r.NTFELITVRPQR.e                                                   | C65H108N20O19    |
| 1507.6783 | 1507.6805 | -0.0023       | -1.5           | 9.28          | 1 | [1066-1077] r.EDDRETLVQSCR.d [1xCarbamidomethyl]                               | C58H98N20O25S    |
| 1560.8351 | 1560.8380 | -0.0029       | -1.9           | 6.91          | 1 | [362-376] k.STTPGGTGKPFLE.f                                                    | C69H113N19O22    |
| 1589.8473 | 1589.8493 | -0.0020       | -1.3           | 3.10          | 1 | [336-350] k.STLSQTVPSKGELSR.e                                                  | C66H116N20O25    |
| 1602.8861 | 1602.8890 | -0.0029       | -1.8           | 0.70          | 1 | [962-975] k.VPFLSSLEGHYLK.i                                                    | C77H119N17O20    |
| 1629.9156 | 1629.9183 | -0.0027       | -1.7           | 5.31          | 1 | [1053-1065] r.RNTEFELITVRPQR.e                                                 | C71H120N24O20    |
| 1644.8157 | 1644.8188 | -0.0030       | -1.8           | 6.73          | 1 | [414-428] k.QDTSSTTHLAQQLK.q                                                   | C67H113N21O27    |
| 1646.7781 | 1646.7803 | -0.0022       | -1.3           | 2.30          | 1 | [223-237] k.QNSVQEQPGTACLK.f [1xCarbamidomethyl]                               | C66H111N21O26S   |
| 1696.7191 | 1696.7218 | -0.0027       | -1.6           | 0.72          | 1 | [549-563] r.EIEMSVDDDDINSSK.v                                                  | C67H109N17O32S   |
| 1712.7129 | 1712.7167 | -0.0038       | -2.2           | 0.66          | 1 | [549-563] r.EIEMSVDDDDINSSK.v [1xOxidation]                                    | C67H109N17O33S   |
| 1737.7561 | 1737.7596 | -0.0035       | -2.0           | 0.49          | 1 | [71-85] r.CSDNTEVEVSNLENK.q [1xCarbamidomethyl]                                | C68H112N20O31S   |
| 1769.8939 | 1769.8963 | -0.0024       | -1.4           | 0.44          | 1 | [918-935] k.SNIHSSVMASPGGLSAVR.t                                               | C73H124N24O25S   |
| 1785.8879 | 1785.8912 | -0.0033       | -1.8           | 9.54          | 1 | [918-935] k.SNIHSSVMASPGGLSAVR.t [1xOxidation]                                 | C73H124N24O26S   |
| 1789.8857 | 1789.8901 | -0.0045       | -2.5           | 0.53          | 1 | [703-717] k.LDEKNNAFPCQVNIK.q [1xCarbamidomethyl]                              | C77H124N22O25S   |
| 1803.9563 | 1803.9599 | -0.0036       | -2.0           | 6.43          | 1 | [360-376] k.DKSTTPGGTGKPFLE.f                                                  | C79H130N22O26    |
| 1862.0201 | 1862.0243 | -0.0041       | -2.2           | 1.34          | 1 | [180-198] k.AASPPRPLLSNASATPVGR.r                                              | C80H136N26O25    |
| 1898.9044 | 1898.9090 | -0.0046       | -2.4           | 2.56          | 1 | [42-59] r.QPLSEASNQQPLSGGEEK.s                                                 | C78H127N23O32    |
| 2008.9973 | 2009.0033 | -0.0060       | -3.0           | 3.55          | 1 | [272-292] k.ALSSSADDASLVNASISSVK.a                                             | C82H141N23O35    |
| 2058.0175 | 2058.0210 | -0.0035       | -1.7           | 0.60          | 1 | [414-431] k.QDTSSTTHLAQQLKQER.q                                                | C83H140N28O33    |
| 2126.0408 | 2126.0473 | -0.0065       | -3.1           | 3.02          | 1 | [40-59] r.ARQPLSEASNQQPLSGGEEK.s                                               | C87H144N28O34    |
| 2146.0958 | 2146.1026 | -0.0069       | -3.2           | 0.39          | 1 | [936-956] r.TSNFALVGSYTLSSVGNK.f                                               | C94H152N24O33    |
| 2195.0372 | 2195.0424 | -0.0052       | -2.4           | 0.47          | 1 | [564-582] k.VINDLFSDVLEEGELDMK.s                                               | C95H151N21O36S   |
| 2211.0304 | 2211.0373 | -0.0069       | -3.1           | 2.22          | 1 | [564-582] k.VINDLFSDVLEEGELDMK.s [1xOxidation]                                 | C95H151N21O37S   |
| 2282.1394 | 2282.1484 | -0.0090       | -3.9           | 0.53          | 1 | [39-59] k.RARQPLSEASNQQPLSGGEEK.s                                              | C93H156N32O35    |
| 2432.1149 | 2432.1212 | -0.0063       | -2.6           | 6.90          | 1 | [656-677] r.AESGDSLGSSEDRLLYSIDAYR.s                                           | C102H158N28O41   |
| 2665.2197 | 2665.2257 | -0.0060       | -2.3           | 0.67          | 1 | [71-94] r.CSDNTEVEVSNLENKQPVESTSAK.s [1xCarbamidomethyl]                       | C107H177N31O46S  |
| 2692.3602 | 2692.3835 | -0.0233       | -8.7           | 0.66          | 1 | [460-482] k.QLETKQETHCQSTPLKKGQVSK.t [1xCarbamidomethyl]                       | C113H190N36O38S  |
| 2692.3602 | 2692.3691 | -0.0089       | -3.3           | 0.66          | 1 | [815-837] k.ADFVCSTVQKPAANYYLIILK.a [1xCarbamidomethyl]                        | C125H190N28O36S  |
| 3368.6248 | 3368.6481 | -0.0233       | -6.9           | 0.64          | 1 | [976-1004] k.IKCQVNSSVEERGLTIFEDVSGFGAWHR.r [1xCarbamidomethyl]                | C150H226N42O45S  |
| 3368.6248 | 3368.6461 | -0.0213       | -6.3           | 0.64          | 1 | [95-127] k.SCSPSPVSPQVQQAADTISDSVAVPASLLGMR.r [1xCarbamidomethyl; 1xOxidation] | C141H234N40O51S2 |

## REVIEWERS' COMMENTS

Reviewer #2 (Remarks to the Author):

The authors have satisfactorily addressed all of my concerns in this round of revision. The reviewer would recommend the publication of this manuscript.

The reviewer would highly recommend the authors to move Figure S1A-C to be part of the main figures. It demonstrated the purify of recombinant anillin as well as its binding of actin filaments. Both are significant advances that would be greatly appreciated by the researchers in the field.

Reviewer #2 (Remarks to the Author):

The authors have satisfactorily addressed all of my concerns in this round of revision. The reviewer would recommend the publication of this manuscript.

The reviewer would highly recommend the authors to move Figure S1A-C to be part of the main figures. It demonstrated the purify of recombinant anillin as well as its binding of actin filaments. Both are significant advances that would be greatly appreciated by the researchers in the field.

We thank the Reviewer for the positive words. We agree with the proposed moving of panels regarding anillin purity and actin-binding properties from supplementary figures to the main figures. They now appear as Fig. 1 b-e.
